# Supplementary material for: Synthesis and application of reversible fluorescent photochromic molecules based on tetraphenylethylene and photochromic groups
Source: Royal Society of Chemistry journal article supplement (doi:10.1039/c8nj05388j), 2018-12-05
Supplement: c8nj05388j1.pdf [file c8nj05388j1.pdf]

**Electronic Supplementary Information (ESI) for New Journal of Chemistry**

**Synthesis and application of reversible fluorescent photochromic  
molecules based on tetraphenylethylene and photochromic groups**

Shanchao Peng,<sup>a</sup> Jiahui Wen,<sup>a</sup> Mingtan Hai,<sup>a</sup> Zhou Yang,<sup>\*a</sup> Xiaotao Yuan,<sup>\*b</sup> Dong Wang,<sup>a</sup> Hui Cao,<sup>a</sup> and Wanli He<sup>a</sup>

<sup>a</sup> School of Materials Science and Engineering, University of Science & Technology Beijing, Beijing, China.

<sup>b</sup> School of Chemistry and Bioengineering, University of Science & Technology Beijing, Beijing, China.

## $^1\text{H}$ NMR, MS spectra of the compounds

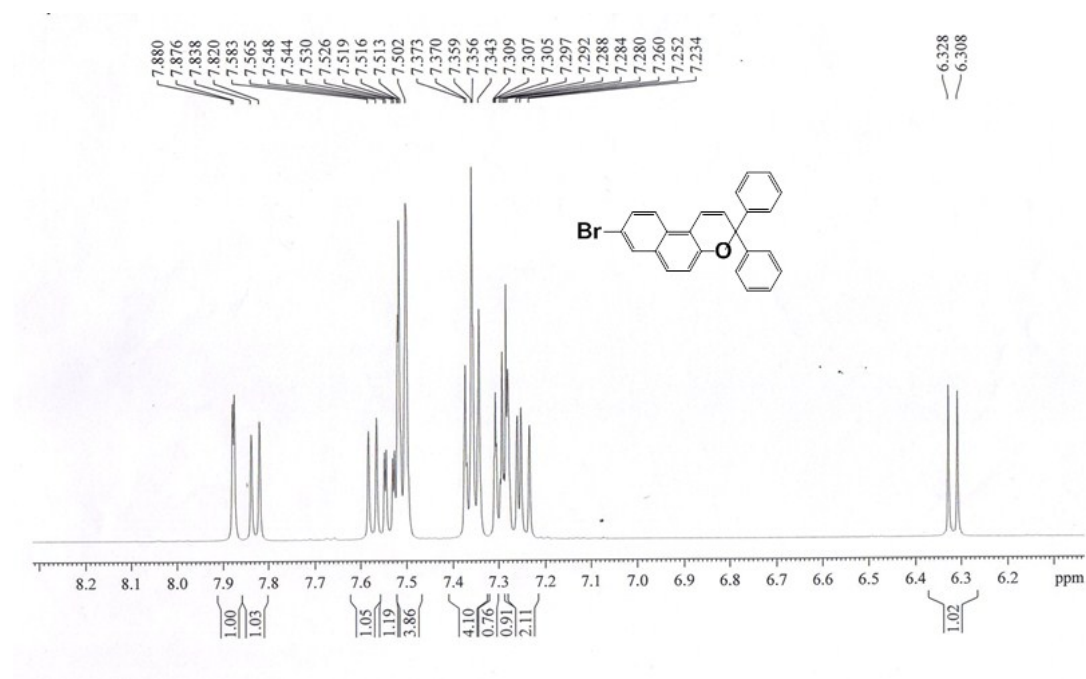

Figure S1  $^1\text{H}$  NMR spectrum of (1)

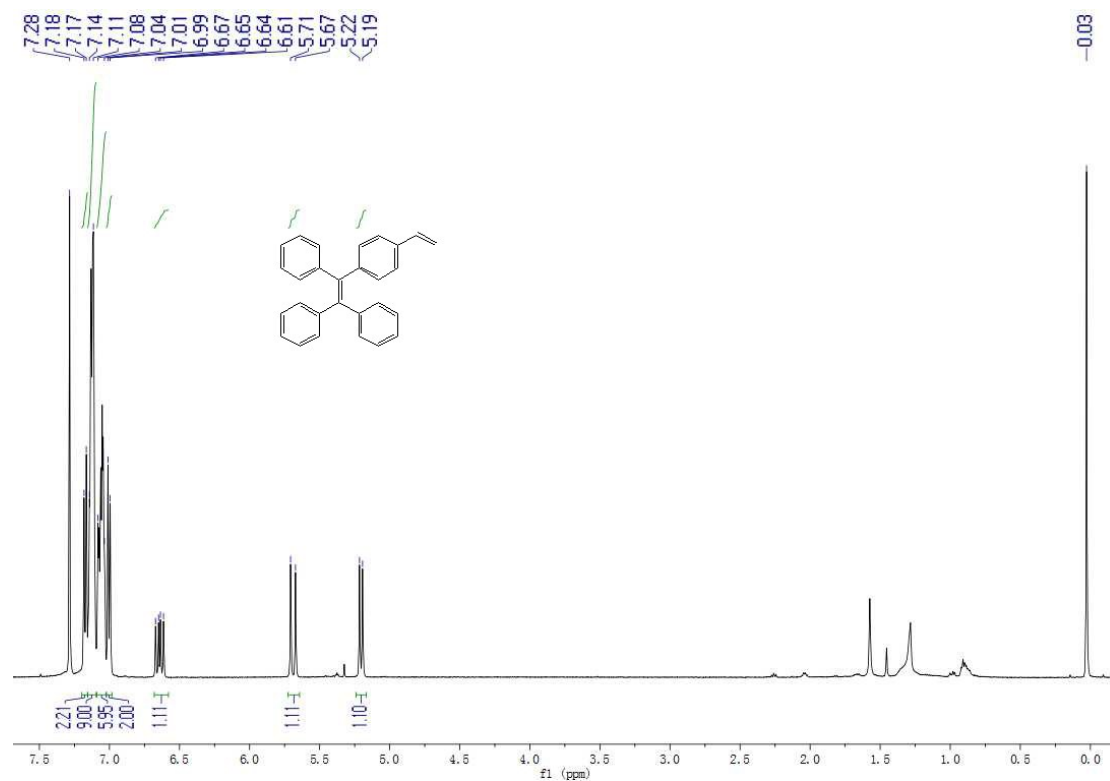

Figure S2  $^1\text{H}$  NMR spectrum of (2)

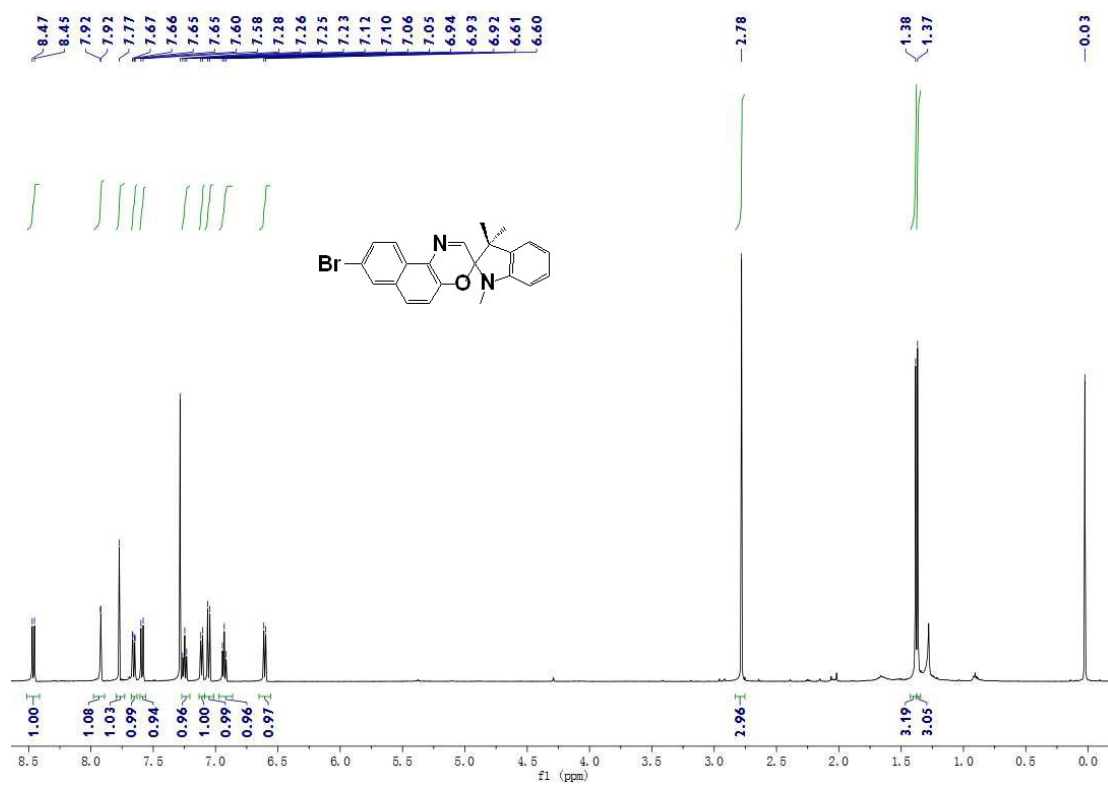

Figure S3 <sup>1</sup>H NMR spectrum of (4)

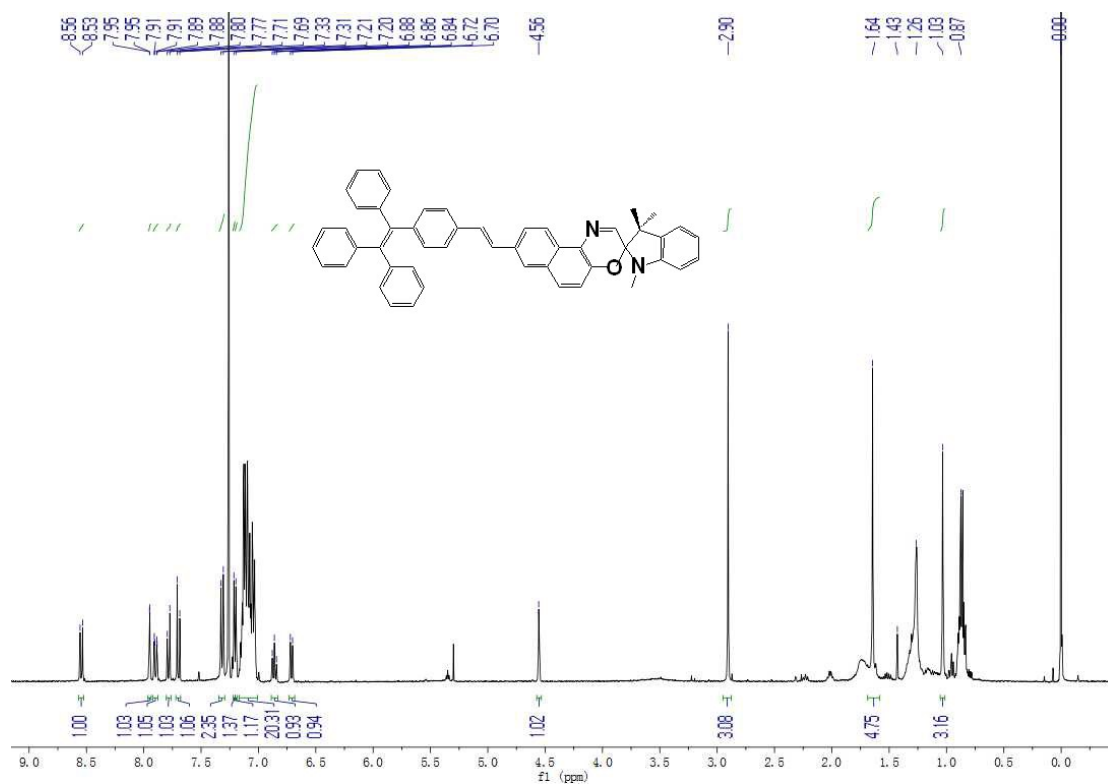

Figure S4 <sup>1</sup>H NMR spectrum of TPE-SO

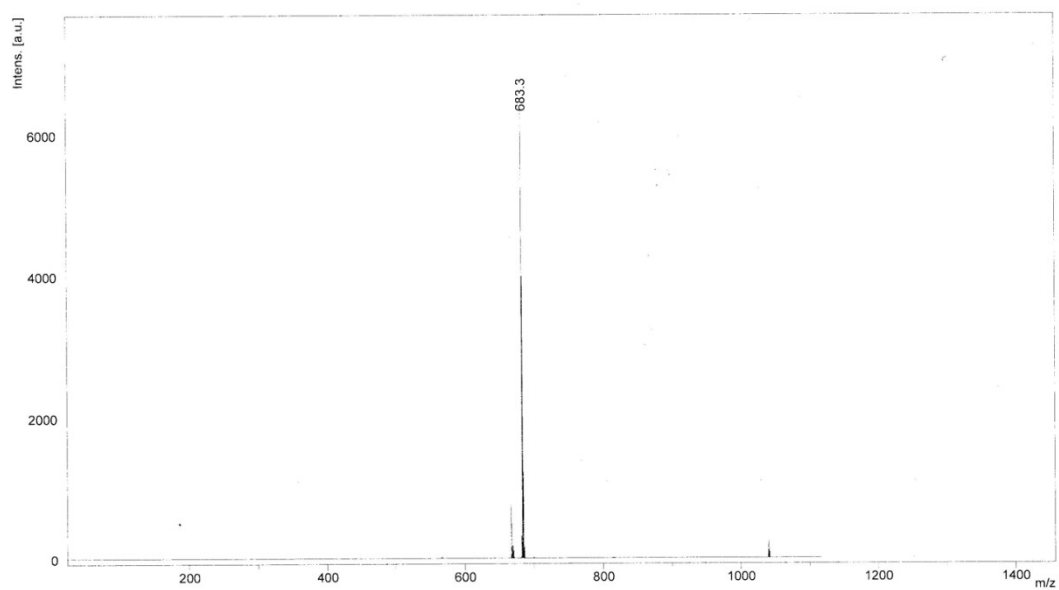

**Figure S5** MALDI-TOF MS spectrum of **TPE-SO**

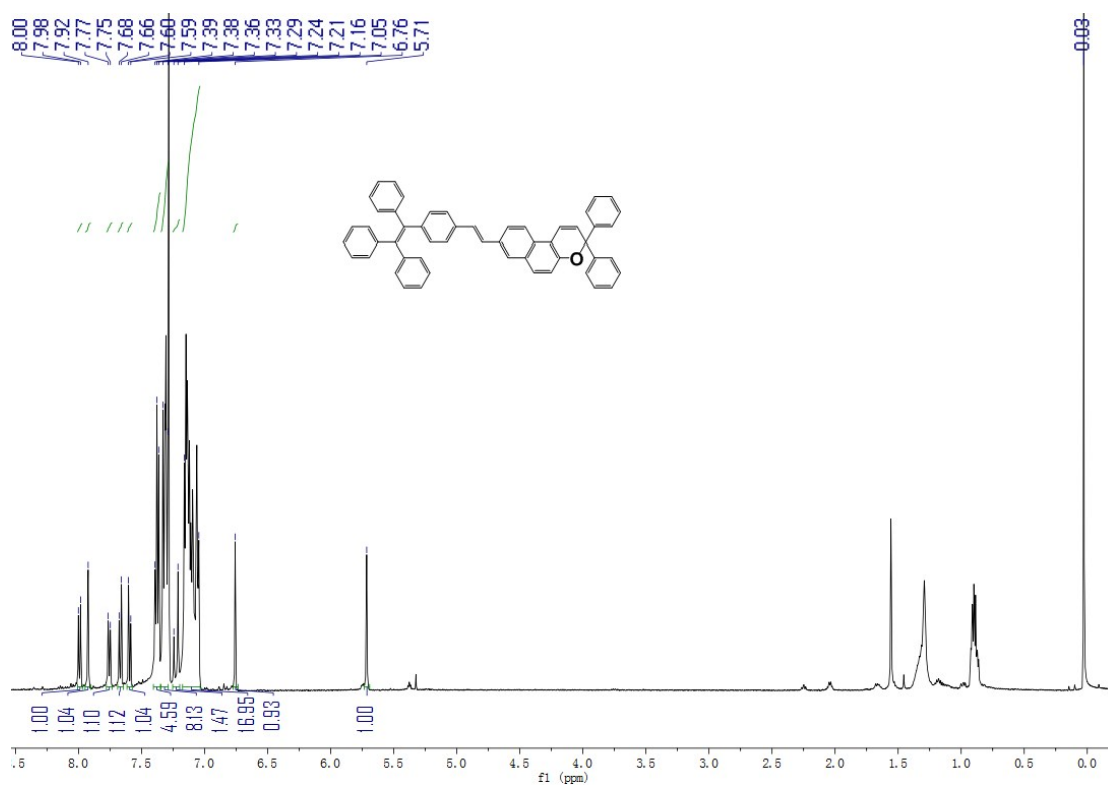

**Figure S6** <sup>1</sup>H NMR spectrum of **TPE-NP**

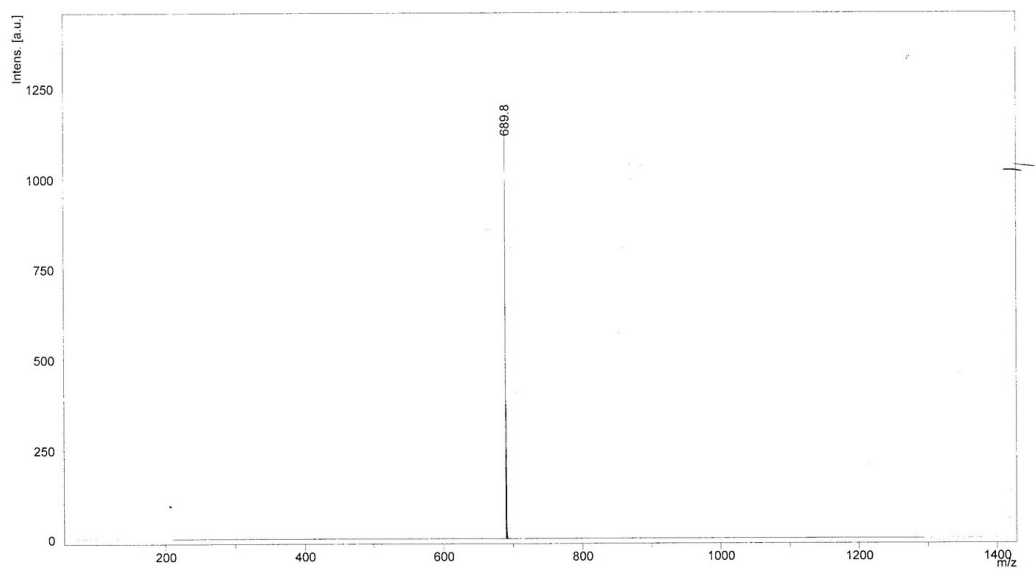

**Figure S7** MALDI-TOF MS spectrum of **TPE-NP**
